# Supplementary material for: Efficient isonitrile hydration through encapsulation within a hexameric self-assembled capsule and selective inhibition by a photo-controllable competitive guest
Source: Royal Society of Chemistry journal article supplement (doi:10.1039/c3cc42233j), 2013-01-01
Supplement: c3cc42233j.pdf [file c3cc42233j.pdf]

## Supporting Information

### Efficient Isonitrile Hydration through Encapsulation within a Hexameric Self Assembled Capsule and Selective Inhibition by a Photo-Modulable Competitive Guest

Giulio Bianchini,<sup>a</sup> Giorgio La Sorella,<sup>a</sup> Nicol  Canever,<sup>a</sup> Alessandro Scarso,<sup>a,\*</sup> Giorgio Strukul<sup>a,\*</sup>

*a) Dipartimento di Scienze Molecolari e Nanosistemi, Universit  Ca' Foscari di Venezia, Calle Larga S. Marta 2137, 30123, Venezia (ITALY). Fax: +39-041-2340517; Tel: +39-041-2348569.*

*alesca@unive.it; strukul@unive.it*

#### General

<sup>1</sup>H-NMR, <sup>13</sup>C{<sup>1</sup>H}-NMR and <sup>31</sup>P{<sup>1</sup>H}-NMR were recorded at 298 K with a BRUKER AVANCE spectrometer operating respectively at 300.15, 75 and 121.5 MHz, respectively.

GC analysis were performed on HP SERIES II 5890 equipped with a HP5 column (30 m, I. D. 0.25 mm, film 0.25 µm) using He as gas carrier and FID. GC-MS analyses were performed on a GC Trace GC 2000 equipped with a HP5-MS column (30 m, I.D. 0.25 mm, film 0.25 µm) using He gas carrier and coupled with a quadrupole MS Thermo Finnigan Trace MS with *Full Scan* method.

Solvents and reactants were used as received; otherwise they were purified as reported in the literature.<sup>1</sup> Product identification was accomplished by reference samples or by comparison with samples obtained as described in the literature for species **2a**,<sup>2</sup> **2b**,<sup>3</sup> **2c** and **2d**,<sup>4</sup> **2e**.<sup>5</sup>

TLC analysis were performed on TLC Polygram<sup>®</sup> Sil G/UV254 of 0.25 mm thickness and flash-chromatography separations were performed on silica gel Merk 60, 230-400 mesh.<sup>6</sup>

Compounds 1,2-bis(5-chloro-2-methylthiophen-3-yl)cyclopent-1-ene, 1,2-*bis*(2-methyl-5-(pyridin-4-yl)thiophen-3-yl)cyclopent-1-ene) **6**, open 4,4'-(4,4'-(cyclopent-1-ene-1,2-diyl)bis(5-methylthiophene-4,2-diyl))bis(1-methylpyridin-1-ium) bis(trifluoromethanesulfonate) **5o** and closed 4,4'-(4,4'-(cyclopent-1-ene-1,2-diyl)bis(5-methylthiophene-4,2-diyl))bis(1-methylpyridin-1-ium) bis(trifluoromethanesulfonate) **5c** were prepared as reported in the literature<sup>7</sup> while resorcin[4]arene **3** was prepared according to reported procedure.<sup>8</sup>

Irradiation at 365 nm was performed with a Wood lamp, omnilux 25 W, irradiance at 365 nm 10 W/m<sup>2</sup> (10 cm) while irradiation in the visible region was performed with a visible light lamp (120 W).

**Table S1.** Catalytic tests for the hydration of **1a** mediated by **3**.

| #              | <b>3</b> <sub>6</sub> | <b>4</b> | <b>2a</b> (%) <sup>a</sup> |
|----------------|-----------------------|----------|----------------------------|
| 1              | -                     | -        | 0                          |
| 2              | +                     | -        | >98                        |
| 3              | +                     | +        | <5                         |
| 4              | -                     | +        | 0                          |
| 5 <sup>b</sup> | -                     | -        | <5                         |

[**1a**]= 60 mM, [**3**]= 36 mM, [**4**]= 60 mM (10 eq. with respect to the capsule), water saturated chloroform-d 0.5 mL, T=60°C, time 18h. +: presence; -: absence; a) Determined by GC; b) [resorcinol] = 144 mM (4 eq. with respect to **3**).

**Table S2.** Catalytic tests for the hydration of **1a-b** mediated by **3**<sub>6</sub>·8H<sub>2</sub>O in the presence of competitive photo-modulable guests **5o** and **5c**.

| # | Substrate | Inhibitor | <b>2a</b> (%) <sup>a</sup>        |
|---|-----------|-----------|-----------------------------------|
| 1 | <b>1a</b> | <b>5o</b> | 10 <sup>b</sup>                   |
| 2 | <b>1a</b> | <b>5c</b> | 33 <sup>b</sup>                   |
| 3 | <b>1a</b> | <b>5o</b> | 33                                |
| 4 | <b>1a</b> | <b>5c</b> | 68                                |
| 5 | <b>1b</b> | <b>5o</b> | 15 <sup>c,d</sup>                 |
| 6 | <b>1b</b> | <b>5c</b> | 26 <sup>c,d</sup>                 |
| 7 | <b>1b</b> | <b>5o</b> | 50 <sup>d</sup> 38 <sup>d,e</sup> |
| 8 | <b>1b</b> | <b>5c</b> | 59 <sup>d</sup> 67 <sup>d,e</sup> |

[**1a-c**]= 60 mM, [**3**]= 36 mM, [**5o** or **5c**]= 6 mM, water saturated chloroform-d 0.5 mL, T=60°C, 18h. a) Determined by GC; b) 3h; c) 2h; d) determined by <sup>1</sup>H-NMR. e) Room temperature for 7 days.

*Synthesis of 1,2-bis(2-methyl-5-(pyridin-4-yl)thiophen-3-yl)cyclopent-1-ene (6)*

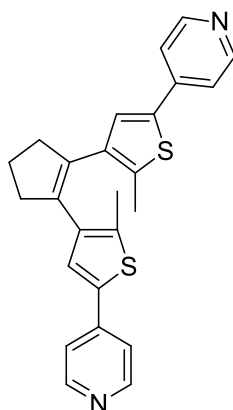

The synthesis of this product is divided in two parts. *Part A* concerns the preparation of THF solution of a thiophene-borate reactant bearing the dithyenylethene moiety suitable for the Suzuki cross coupling. *Part B* reports the cross-coupling reaction.

*Part A.* A two necks round bottom flask equipped with a rubber septum and connected to a vacuum/nitrogen line was flame dried and three vacuum/nitrogen cycles performed. Subsequently under nitrogen atmosphere 1,2-bis(5-chloro-2-methylthiophen-3-yl)cyclopent-1-ene (1.88 g, 0.0057 mol) and dry THF (15 mL) were added. The resulting mixture was cooled to 0°C with an ice bath and *n*-BuLi (2.5 M, 5.04 mL, 0.0126 mol) was slowly added with a syringe. During the addition the mixture turned dark grey and upon completion of the addition it was stirred for further 15 min at the same temperature. Subsequently *tris-n*-butylborate (3.94 g, 4.62 mL, 0.0171 mol) was added in one portion with a syringe and the resulted orange solution was allowed to warm up to room temperature and stirred for 1h.

*Part B.* To a two necks round bottom flask equipped with a condenser, THF (20 mL) and Pd(PPh<sub>3</sub>)<sub>4</sub> (0.370 g, 3.2·10<sup>-4</sup> mol) were added and the resulting solution heated at 70°C. After 15 min at this temperature, aqueous K<sub>2</sub>CO<sub>3</sub> (2 M, 25 mL, 0.05 mol), ethylene glycol (10 drops), 4-bromopyridine hydrochloride (2.43 g, 0.00125 mol) were added and, to the well stirred solution at the same temperature, the THF solution containing the borate prepared in *Part A* was slowly added with a syringe. The mixture was left at 70°C for 16h further cooled to room temperature followed by addition of water (20 mL) and product extraction with diethyl ether (3x50 mL). The combined organic phases were dried over MgSO<sub>4</sub> and concentrated under reduced pressure. The product was obtained as a light violet solid in 62% yield.

$^1\text{H-NMR}$  (300.15 MHz,  $\text{CDCl}_3$ ):  $\delta$  2.02 (s, 6H), 2.11 (q,  $J=7.5$  Hz, 2H), 2.85 (t,  $J=7.5$  Hz, 4H), 7.21 (s, 2H), 7.34 (dd,  $J=4.6$  and 1.7 Hz, 4H), 8.53 (dd,  $J=4.6$  and 1.7 Hz, 4H)

$^{13}\text{C-NMR}$  (75 MHz,  $\text{CDCl}_3$ ):  $\delta$  14.64, 22.98, 38.45, 119.24, 126.27, 134.79, 136.65, 137.07, 137.26, 141.27, 150.24.

*Synthesis of open isomer 4,4'-(4,4'-(cyclopent-1-ene-1,2-diyl)bis(5-methylthiophene-4,2-diyl))bis(1-methylpyridin-1-ium) bis(trifluoromethanesulfonate) (5o)*

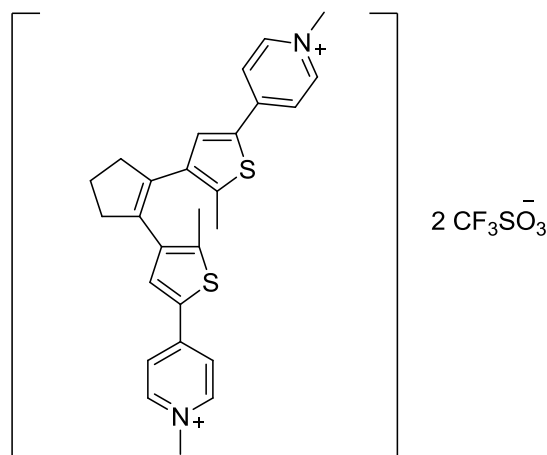

A two necks round bottom flask connected to a vacuum/nitrogen line was flame dried and three vacuum/nitrogen cycles were performed, subsequently under nitrogen atmosphere **6** (0.47 g, 0.0011 mol) and dry dichloromethane (20 mL) were added. To the well stirred solution methyl trifluoromethanesulfonate (0.54 g, 0.37 mL, 0.0033 mol) was then added with a syringe and immediately the light violet solution turned greenish. The mixture was stirred for further 16h. The solvent and the un-reacted methyl triflate were removed under vacuum and the product isolated in quantitative yield was not further purified.

$^1\text{H-NMR}$  (300.15 MHz,  $\text{CD}_3\text{CN}$ ):  $\delta$  2.11 (s, 6H), 2.13 (q,  $J=7.4$  Hz, 2H), 2.88 (t,  $J=7.4$  Hz, 4H), 4.17 (s, 6H), 7.78 (s, 2H), 7.94 (d,  $J=6.8$  Hz, 4H), 8.44 (d,  $J=6.8$  Hz, 4H)

$^1\text{H-NMR}$  (300.15 MHz,  $\text{D}_2\text{O}$ ):  $\delta$  1.93 (s, 3H), 2.01 (q,  $J=7.4$  Hz, 2H), 2.76 (t,  $J=7.4$  Hz, 4H), 4.11 (s, 6H), 7.70 (s, 2H), 7.84 (d,  $J=7.1$  Hz, 4H), 8.39 (d,  $J=7.1$  Hz, 4H)

$^{13}\text{C-NMR}$  (75 MHz,  $\text{CD}_3\text{CN}$ ):  $\delta$  13.40, 14.24, 38.07, 47.03, 121.58, 132.94, 132.99, 135.11, 138.91, 144.65, 144.93, 148.49; (12 of 13 found)

*Synthesis of closed isomer 4,4'-(4,4'-(cyclopent-1-ene-1,2-diyl)bis(5-methylthiophene-4,2-diyl))bis(1-methylpyridin-1-ium) bis(trifluoromethanesulfonate) (5c)*

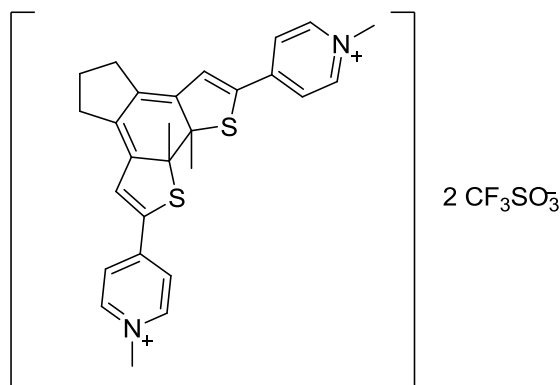

**5o** (0.003 g,  $4.04 \cdot 10^{-6}$  mol) and the desired deuterated solvent (0.65 mL) were loaded in a NMR tube. The resulting solution was irradiated with a Wood lamp until the ring closing reaction was complete (about 5 min) as confirmed by acquisition of the  $^1\text{H}$  NMR spectrum. During the irradiation the sample became dark green.

$^1\text{H}$ -NMR (300.15 MHz,  $\text{D}_2\text{O}$ ):  $\delta$  1.86 (q,  $J=7.2$  Hz, 2H), 1.97 (s, 6H), 2.53 (t,  $J=7.2$  Hz, 4H), 4.18 (s, 6H), 7.19 (s, 2H), 7.83 (d,  $J=6.2$  Hz, 4H), 8.48 (d,  $J=6.2$  Hz, 4H)

*Typical procedure for isonitrile hydration reaction in presence of 5o*

In a 1.5 mL vial were introduced a water saturated chloroform solution of **3** (36 mM, 0.5 mL) and **5o** (1 eq. with respect to  $\mathbf{3_6} \cdot 8\text{H}_2\text{O}$ , 0.003 mmol, 2.3 mg) and the resulted mixture vigorously stirred until completely homogeneous. Subsequently the desired isonitrile was added (10 eq. with respect to  $\mathbf{3_6} \cdot 8\text{H}_2\text{O}$ , 0.030 mmol), the vial sealed and thermostatted at  $60^\circ\text{C}$ . The reaction progression was followed by GC or  $^1\text{H}$ -NMR analyses sampling the reaction mixture at different times.

*Typical procedure for isonitrile hydration reaction in presence of 5c*

**5o** (0.003 mmol, 2.3 mg) was photoisomerized to **5c** in an acetonitrile solution as previously described. After solvent removal at reduced pressure, a water saturated chloroform solution of **3** (36 mM, 0.5 mL) was added and the system stirred until completely homogeneous. Subsequently the desired isonitrile was added (10 eq. with respect to  $\mathbf{3_6} \cdot 8\text{H}_2\text{O}$ , 0.030 mmol) and the obtained solution transferred in a 1.5 mL vial which was in turn sealed and thermostatted at  $60^\circ\text{C}$ . The reaction progression was followed by GC or  $^1\text{H}$ -NMR analyses sampling the reaction mixture at different times.

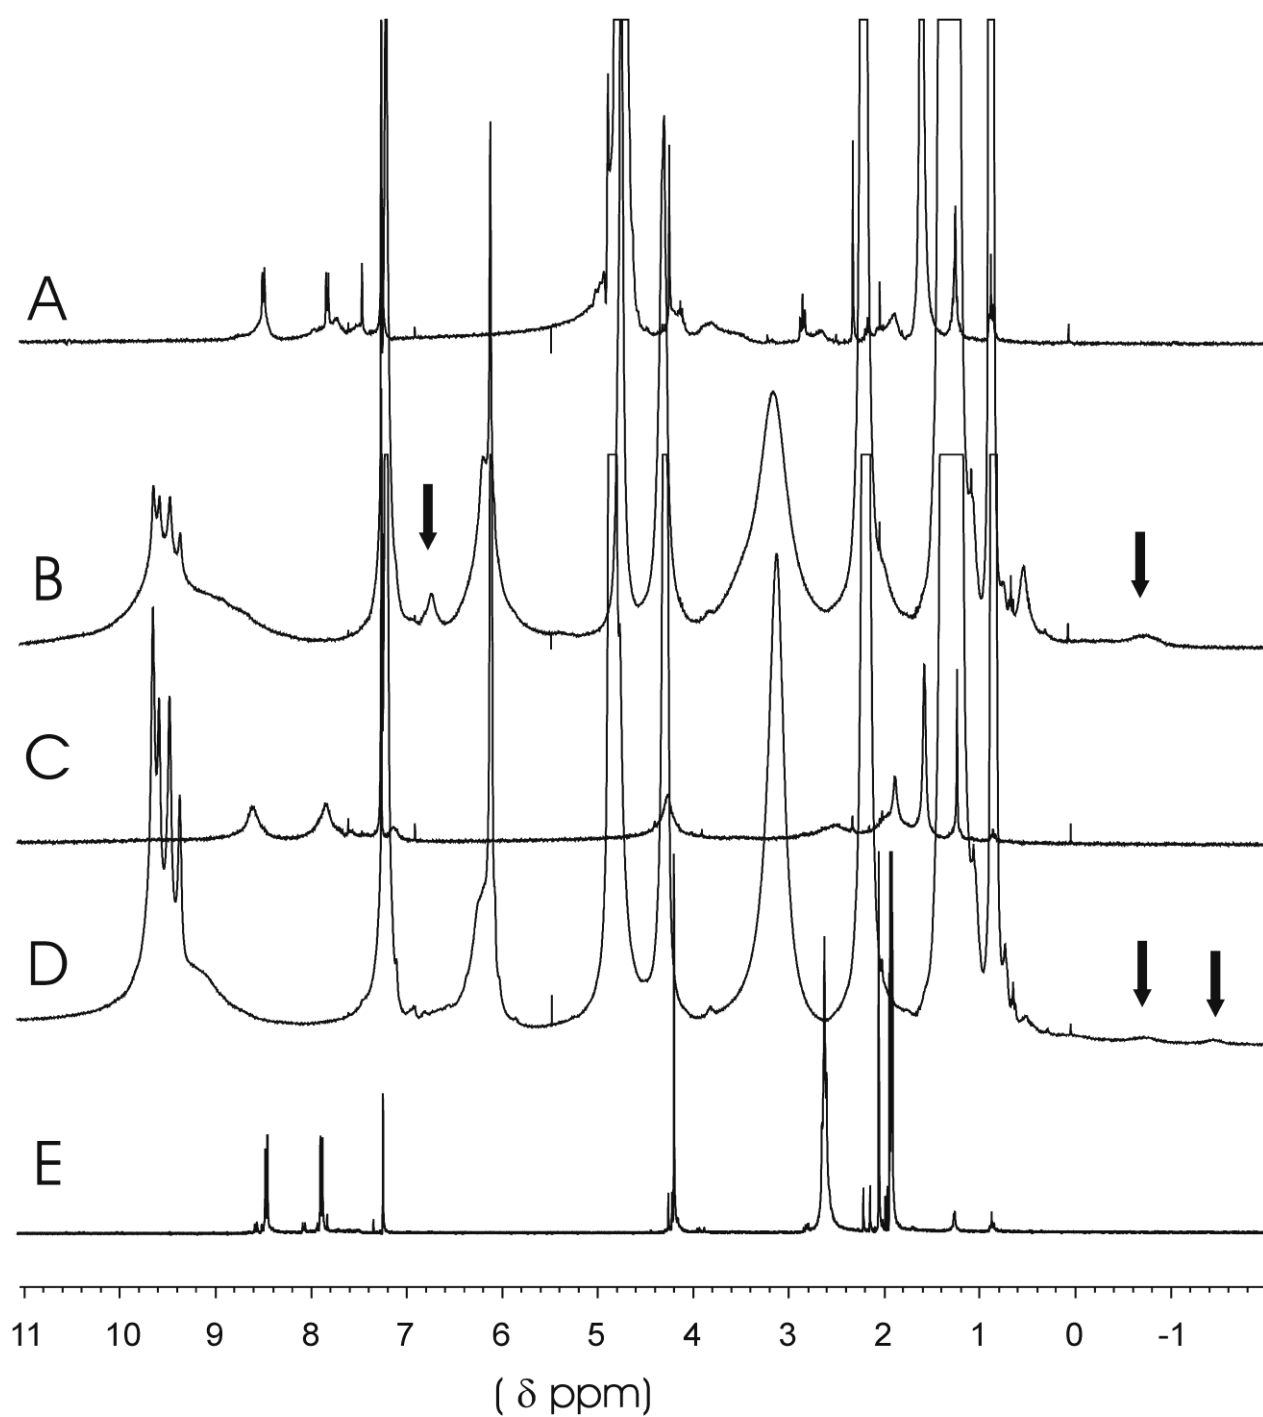

**Figure S1.** A) free open cation **5o** (6 mM) in water saturated chloroform- $d_3$ ; B) **5o** open *bis*-cation(6 mM) and **3** (36 mM); C) **5c** closed *bis*-cation (6 mM); D) **5c** (6 mM) and **3** (36 mM); E) **5c** closed *bis*-cation (6 mM in acetonitrile- $d_3$ ); ↓ encapsulated inhibitor.

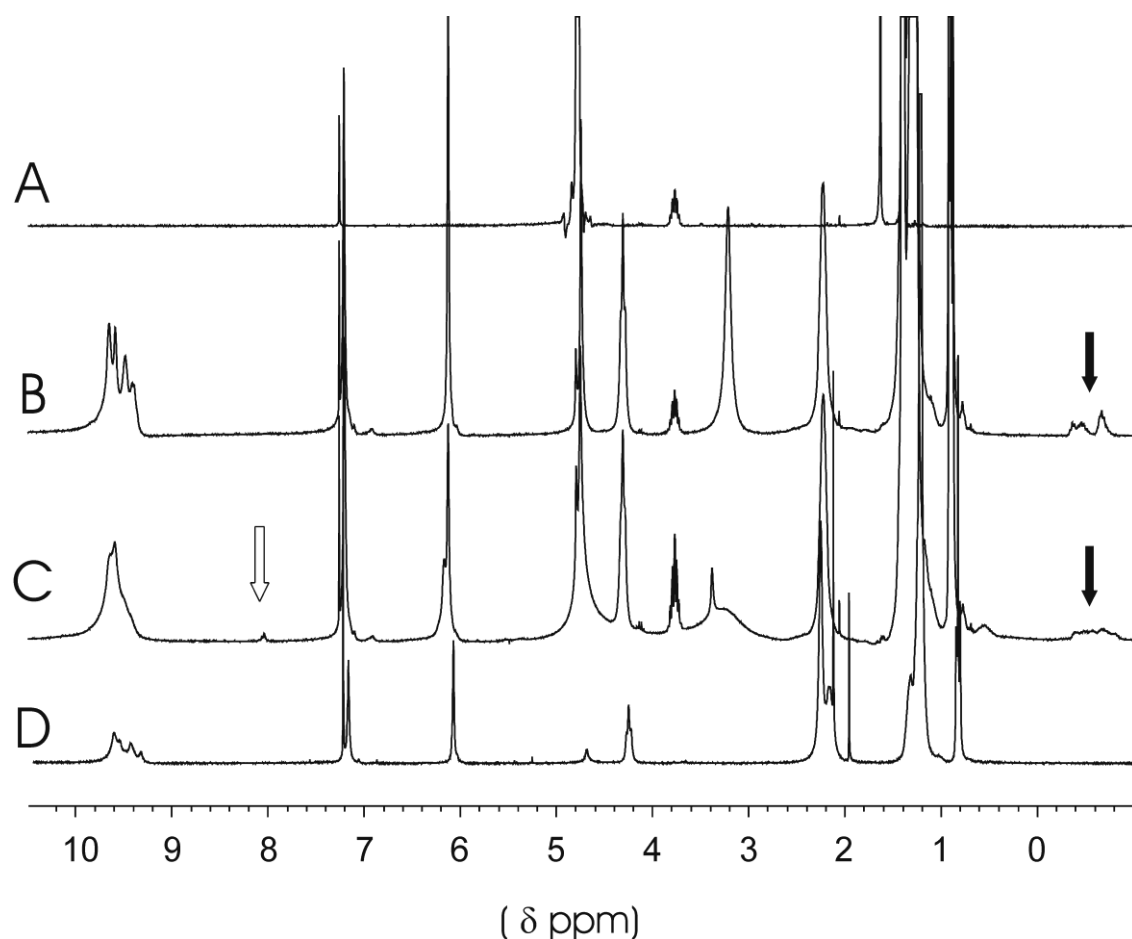

**Figure S2.**  $^1\text{H}$  NMR spectra in water saturated chloroform- $d$ : A) **1b** *i*-propylisonitrile (60 mM); B) **1b** (60 mM) and **3** (36 mM); C) **1b** (120 mM) and **3** (36 mM); D) **3** (36 mM).  $\blacktriangledown$  encapsulated substrate,  $\nabla$  *N*-formylamide product.

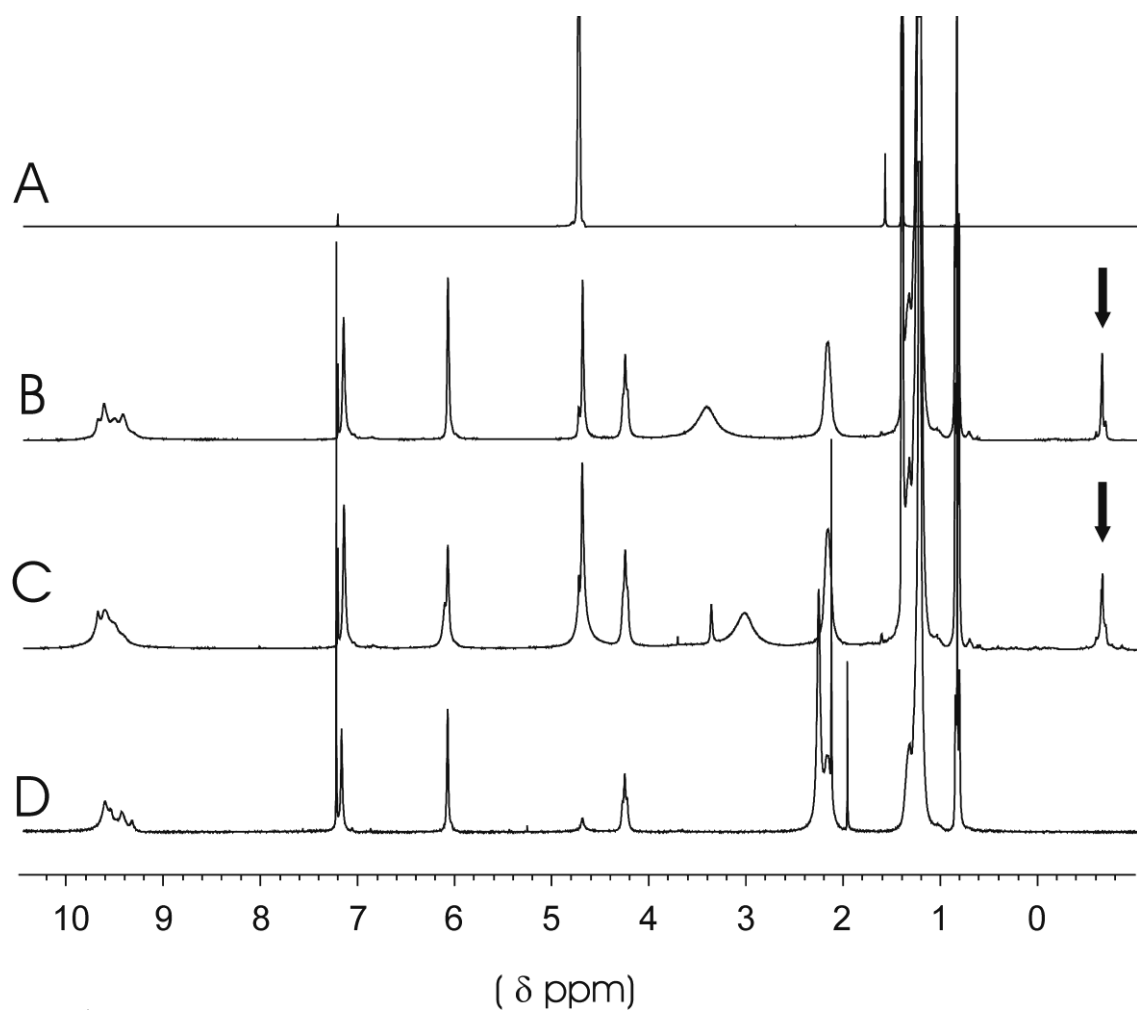

**Figure S3.**  $^1\text{H}$  NMR spectra in water saturated chloroform- $d$ : A) **1c** *t*-butylisonitrile (60 mM); B) **1c** (60 mM) and **3** (36 mM); C) **1c** (120 mM) and **3** (36 mM); D) **3** (36 mM).  $\downarrow$  encapsulated substrate.



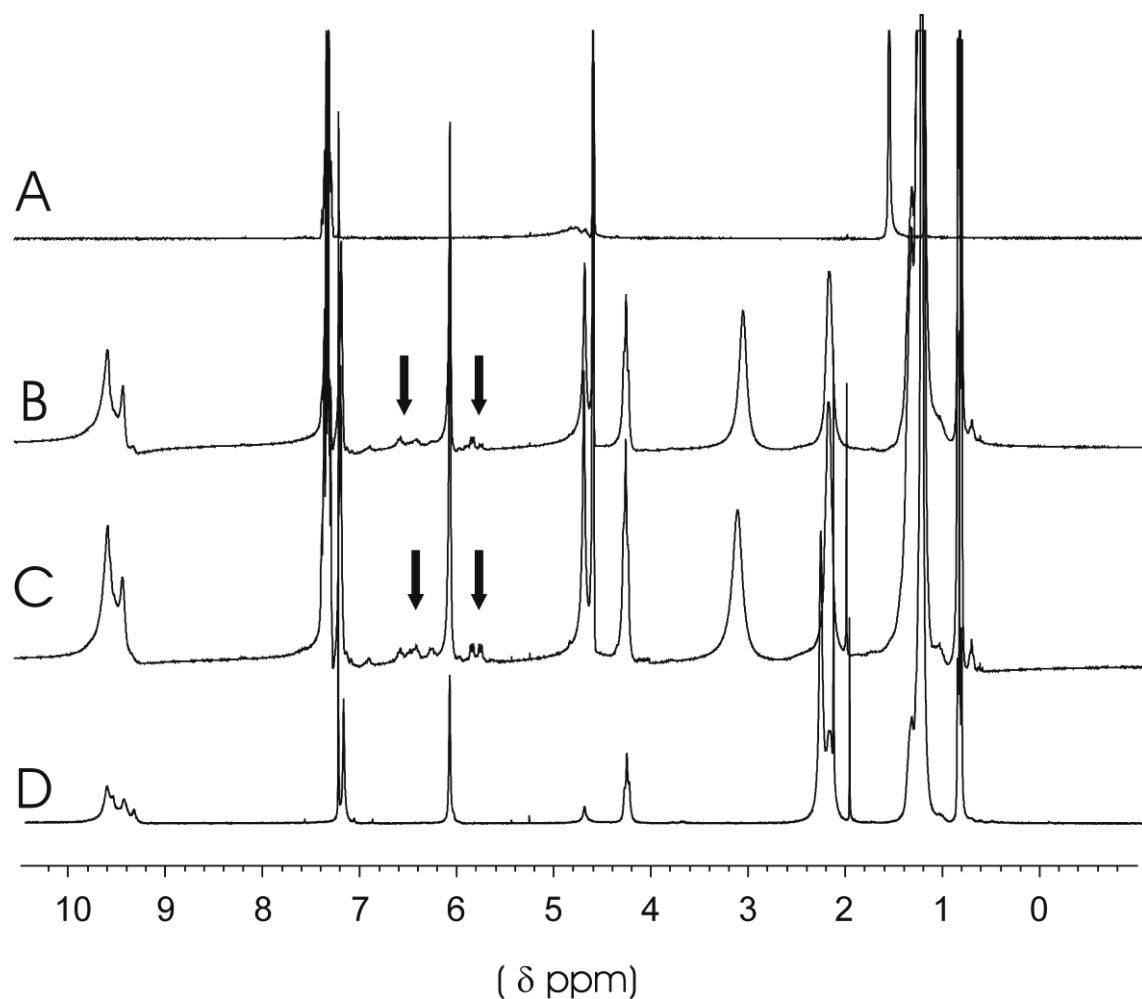

**Figure S4.**  $^1\text{H}$  NMR spectra in water saturated chloroform- $d$ : A) **1d** benzylisonitrile (60 mM); B) **1d** (60 mM) and **3** (36 mM); C) **1d** (120 mM) and **3** (36 mM); D) **3** (36 mM).  $\blacktriangledown$  encapsulated substrate,  $\blacktriangleup$  *N*-formylamide product.

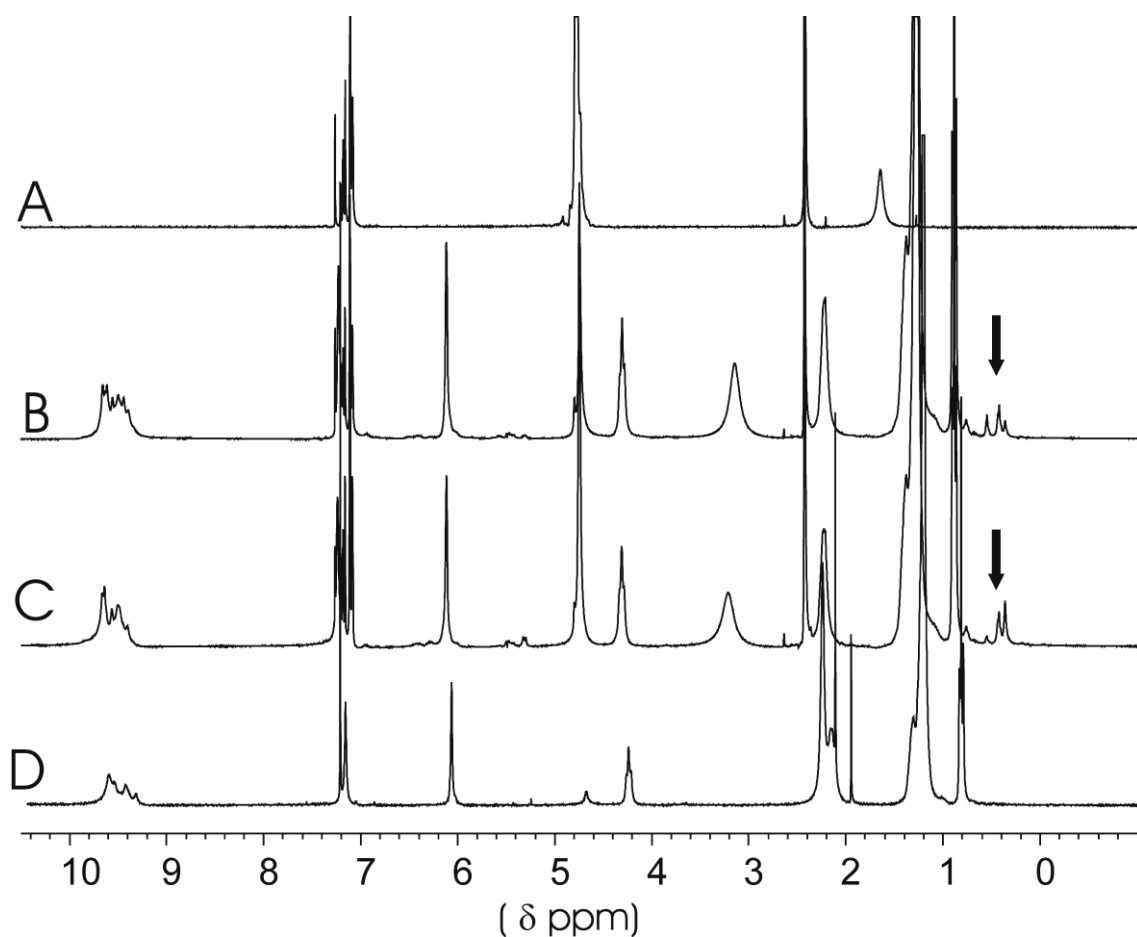

**Figure S5.**  $^1\text{H}$  NMR spectra in water saturated chloroform- $d$ : A) **1e** 2,6-dimethyl-phenylisonitrile (60 mM); B) **1e** (60 mM) and **3** (36 mM); C) **1e** (120 mM) and **3** (36 mM); D) **3** (36 mM).  $\downarrow$  encapsulated substrate.

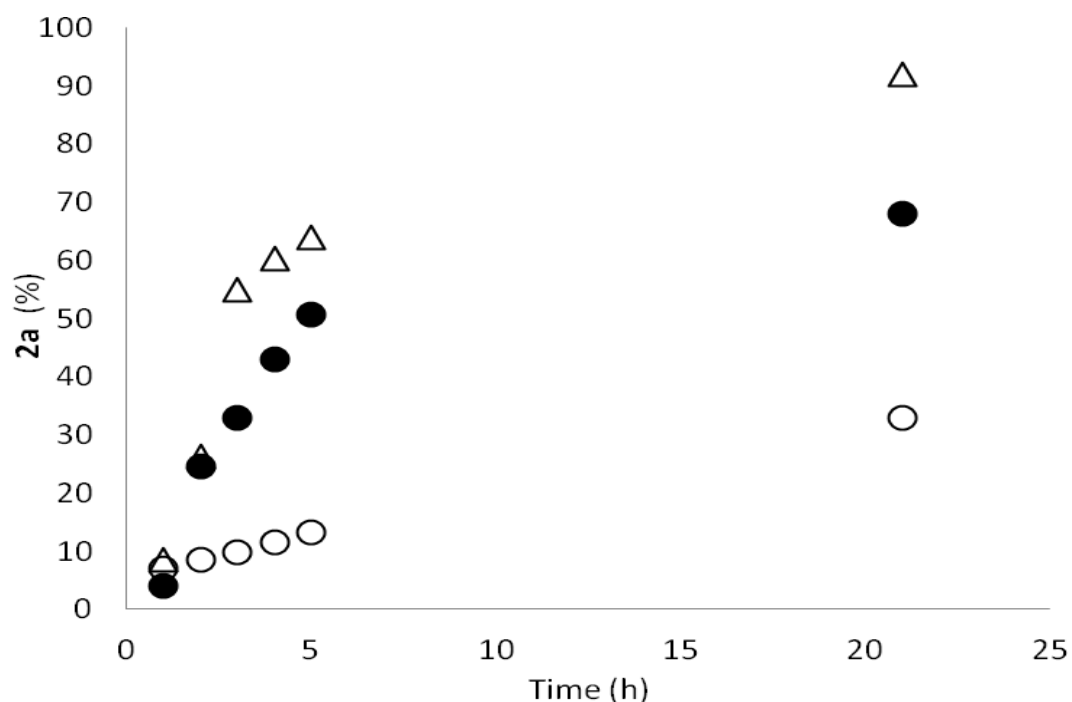

**Figure S6.** Hydration of **1a** to **2a** in water saturated chloroform- $d$  (0.5 mL) at 60°C in the presence of a) free  $3 \cdot 8H_2O$  ( $\Delta$ ); b)  $3 \cdot 8H_2O$  with **5o** ( $\circ$ ); c)  $3 \cdot 8H_2O$  with **5c** ( $\bullet$ ). **3** (36 mM), **1a** (60 mM) and **5o** or **5c** (6 mM).

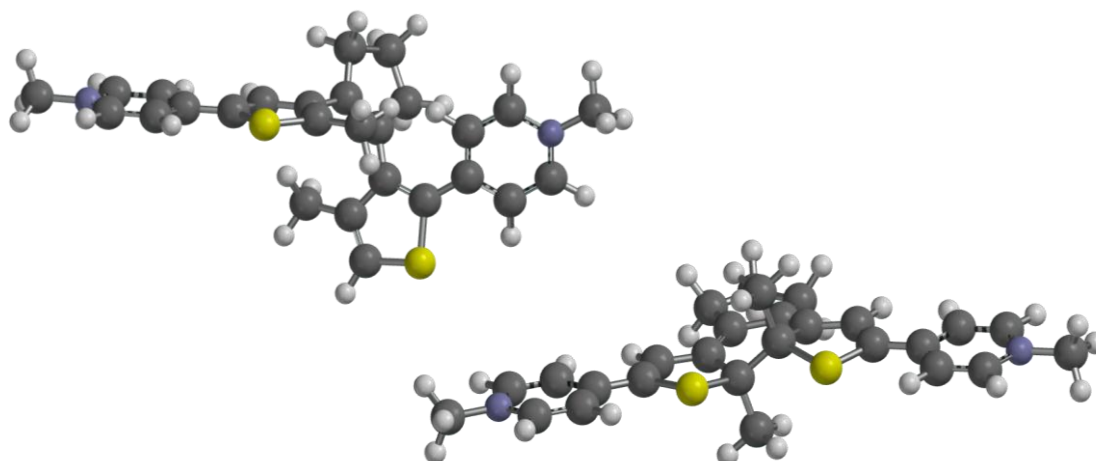

**Figure S7.** Open, top, and closed, bottom, bis-pyridinium ion **5o** and **5c**.

1 D.D. Perrin, W.L.F. Armarego, Purification of laboratory chemicals, 3<sup>rd</sup> edition, Pergamon Press, 1993.

<sup>2</sup> J. Azuaje, A. Coelho, A. E. Maatougui, E. Sotelo, J. M. Blanco, *ACS Comb. Sci.* 2011, **13**, 89.

3 J.F. Schindler, K.B. Berst; B.V. Plapp, *J. Med. Chem.* 1998, **41**, 1696.

4 T.B. Nguyen, J. Sorres, M.Q. Tran, L. Ermolenko, A. Al-Mourabit, *Org. Lett.* 2012, **14**, 3202.

5 a) T. Nanjo, C- Tsukano, Y. Takemoto, *Org. Lett.* 2012, **14**, 4270; b) J. Li, N. Wang, C. Li, X. Jia, *Chem. Eur. J.* 2012, **18**, 9645-.

6 W. C. Still, M. Khan, A. Mitra *J. Org. Chem.* 1978, **43**, 2923.

7 a) B. Qin, R. Yao, X. Zhao, H. Tian *Org. Biomol. Chem.* 2003, **1**, 2187; b) J. J. D. de Jong, L. N. Lucas, R. Hania, A. Pugzlys, R. M. Kellog, B. L. Feringa, K. Duppen, J. H. van Esch *Eur. J. Org. Chem.* 2003, 1887; c) W. R. Browne, J. J. D. de Jong, T. Kudernac, M. Walko, L. N. Lucas, K. Uchida, J. H. van Esch, B. L. Feringa *Chem. Eur. J.* 2005, **11**, 6430.

8 Y. Aoyama, Y. Tanaka, S. Sugahara *J. Am. Chem. Soc.* 1989, **111**, 5397.
